# Supplementary material for: Eco-Geography and Phenology Are the Major Drivers of Reproductive Isolation in the Royal Irises, a Species Complex in the Course of Speciation
Source: MDPI journal article supplement (doi:10.3390/plants11233306), 2022-11-29
Supplement: s1 [file s1]

**Maxent, *Iris atrofusca***

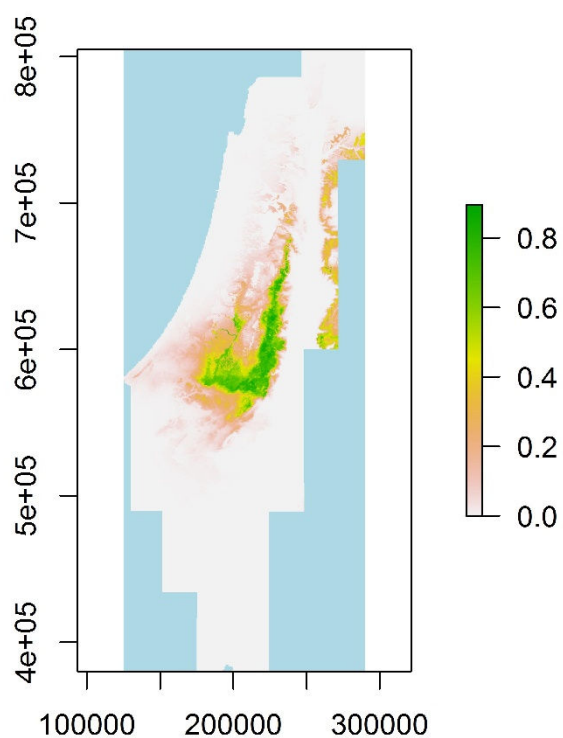

**Maxent, *Iris atropurpurea***

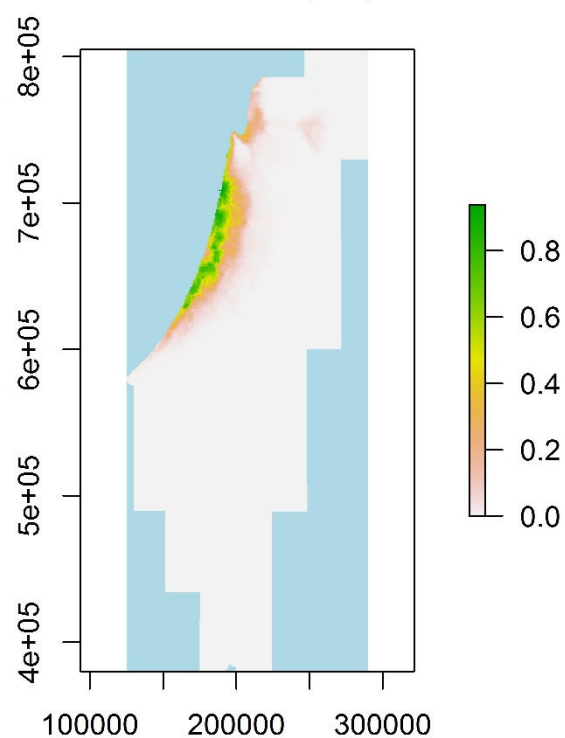

A.

B.

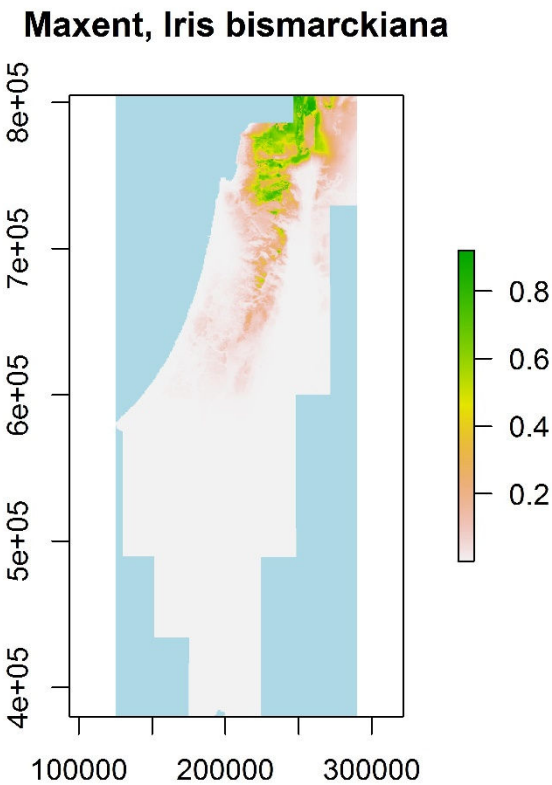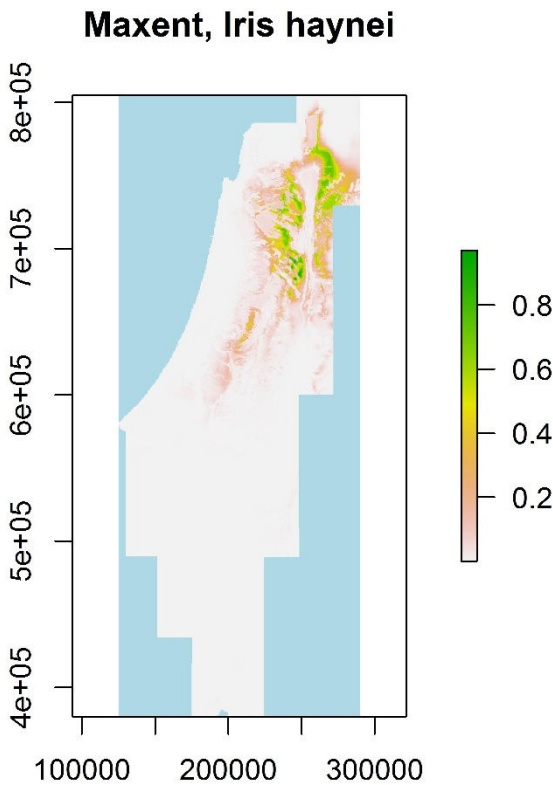

C.

D.

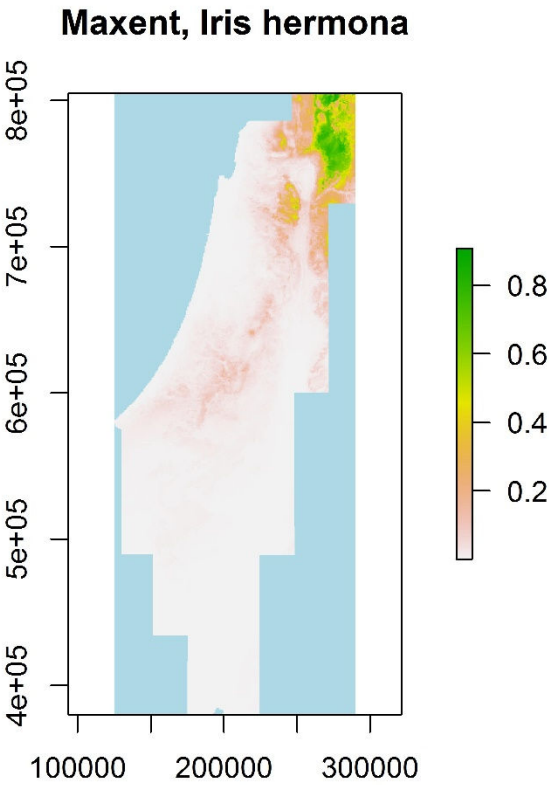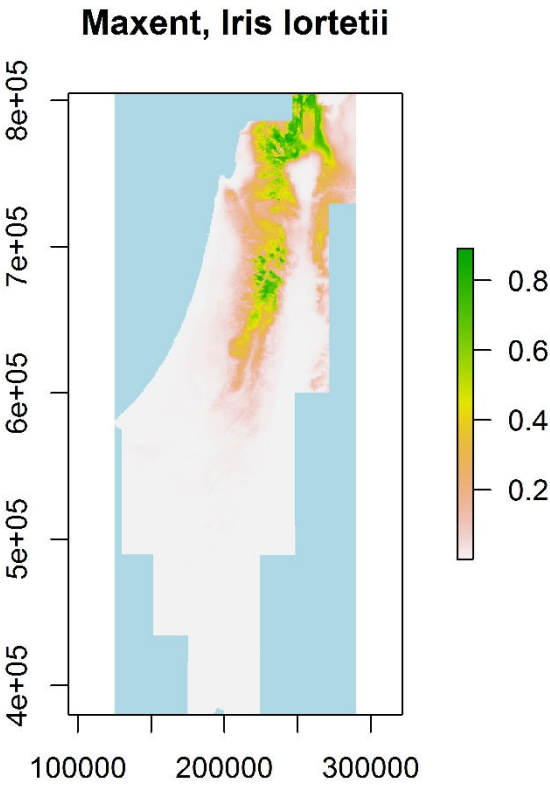

E.

F.

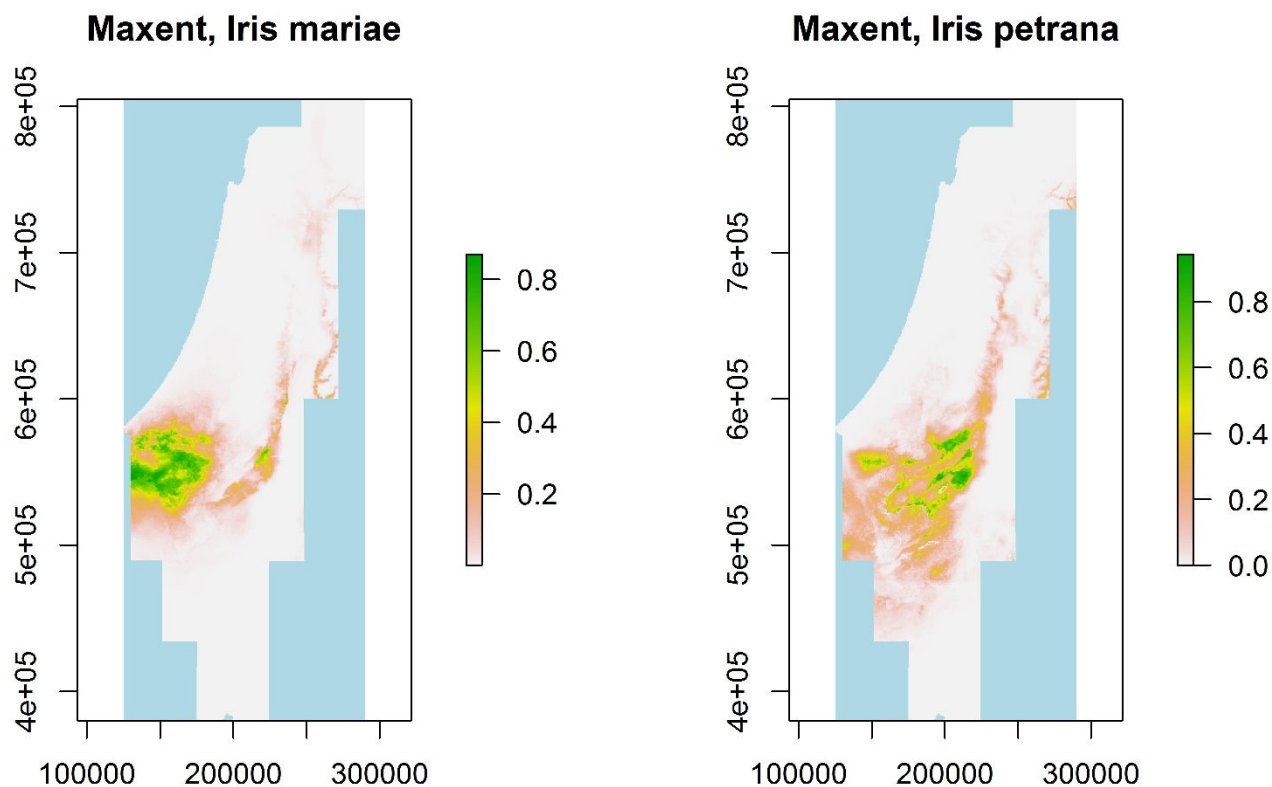

G.

H.

Figure S3 – The potential distribution of the eight Israeli *Oncocyclus* Irises, as predicted by the SDMs, performed with MaxEnt. A. *Iris atrofusca*; B. *I. atropurpurea*; C. *I. bismarckiana*; D. *I. haynei*; E. *I. hermona*; F. *I. lortetii*; G. *I. mariae*; H. *I. petrana*.
