# Supplementary material for: Eco-Geography and Phenology Are the Major Drivers of Reproductive Isolation in the Royal Irises, a Species Complex in the Course of Speciation
Source: MDPI journal article supplement (doi:10.3390/plants11233306), 2022-11-29
Supplement: s1 [file s1]

AUC – maxent + GLM:

|                        | AUC -<br>maxent | AUC –<br>GLM |
|------------------------|-----------------|--------------|
| <i>I. atrofusca</i>    | 0.922           | 0.96         |
| <i>I. atropurpurea</i> | 0.930           | 1            |
| <i>I. bismarckiana</i> | 0.917           | 0.94         |
| <i>I. haynei</i>       | 0.920           | 0.93         |
| <i>I. hermona</i>      | 0.917           | 0.92         |
| <i>I. lortetii</i>     | 0.904           | 0.96         |
| <i>I. mariae</i>       | 0.896           | 0.97         |
| <i>I. petrana</i>      | 0.912           | 0.96         |
